# Supplementary material for: Serendipitous In Situ Conservation of Faba Bean Landraces in Tunisia: A Case Study
Source: MDPI journal article supplement (doi:10.3390/genes11020236), 2020-02-24
Supplement: s1 [file s1]

**Table S3.** Analysis of molecular variance (AMOVA) of 29 NGTB faba bean split according to the collecting sites (El Hamra, Oued Ghrib and Fouazia).

| Source of variation | df | SS     | MS   | Est. Var. | <i>p</i> values |
|---------------------|----|--------|------|-----------|-----------------|
| Among groups        | 1  | 3.65   | 3.65 | 0.01      | n.s             |
| Within groups       | 49 | 161.94 | 3.31 | 3.3       |                 |
| Total               | 50 | 165.59 |      | 3.31      |                 |

df = degree of freedom; SS = sum of squares; MS = mean squares; Est. var. = estimate of variance.
