# Supplementary material for: Serendipitous In Situ Conservation of Faba Bean Landraces in Tunisia: A Case Study
Source: MDPI journal article supplement (doi:10.3390/genes11020236), 2020-02-24
Supplement: s1 [file s1]

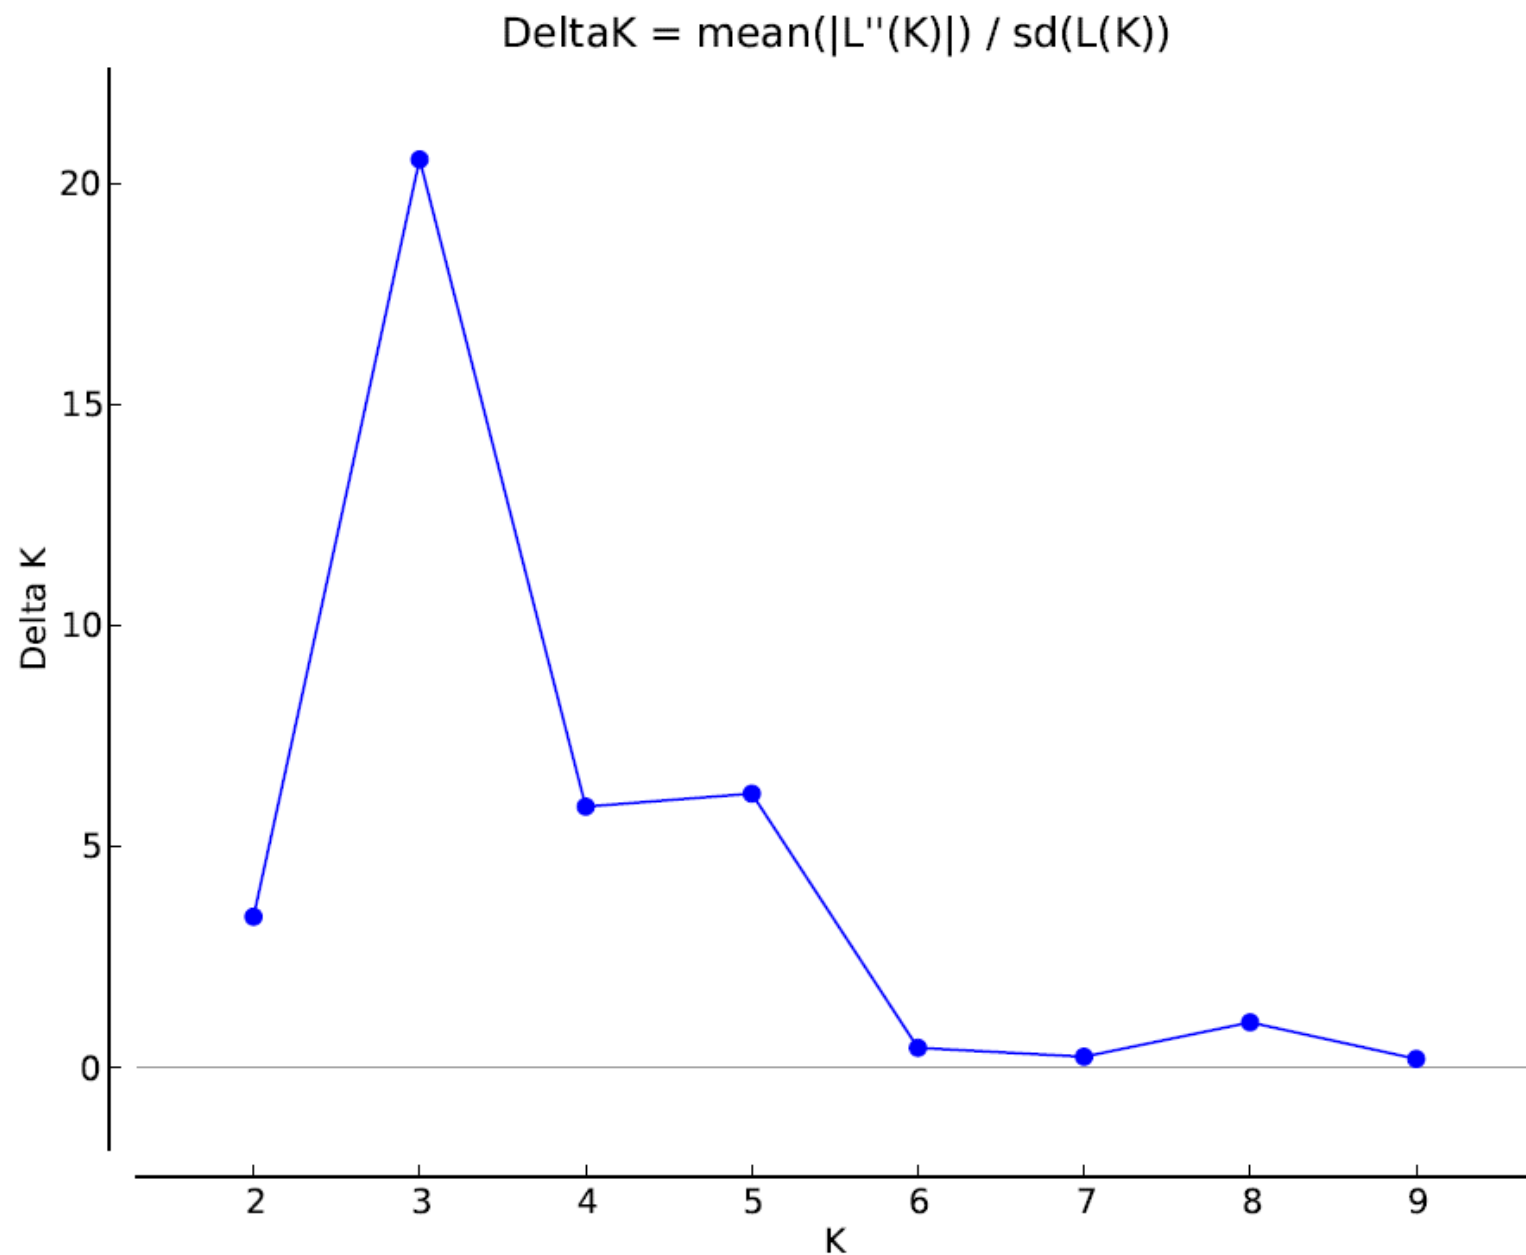

**Figure S2.** Delta K for differing numbers of subpopulations (K) estimated in faba bean collection with 11 markers.
