# Supplementary material for: Serendipitous In Situ Conservation of Faba Bean Landraces in Tunisia: A Case Study
Source: MDPI journal article supplement (doi:10.3390/genes11020236), 2020-02-24
Supplement: s1 [file s1]

**Table S2.** Number of different alleles (*Na*), Shannon's information index (*I*), Heterozygosity observed (*Ho*), Heterozygosity expected (*He*) and Fixation Index (*F*) of 11 SSR markers used in faba bean collection.

|                  | <b>M9</b> | <b>M22</b> | <b>M25</b> | <b>M27</b> | <b>M36</b> | <b>M41</b> | <b>M43</b> | <b>M46</b> | <b>SSR1</b> | <b>VFG1</b> | <b>VFG41</b> |
|------------------|-----------|------------|------------|------------|------------|------------|------------|------------|-------------|-------------|--------------|
| <b><i>Na</i></b> | 6         | 3          | 8          | 8          | 9          | 5          | 6          | 3          | 10          | 14          | 22           |
| <b><i>I</i></b>  | 1.411     | 0.447      | 1.368      | 1.278      | 1.709      | 1.347      | 1.304      | 0.764      | 1.808       | 2.216       | 2.646        |
| <b><i>Ho</i></b> | 0.447     | 0.250      | 0.733      | 0.45       | 0.897      | 0.640      | 0.408      | 0.600      | 0.940       | 0.848       | 0.237        |
| <b><i>He</i></b> | 0.674     | 0.225      | 0.662      | 0.603      | 0.779      | 0.707      | 0.66       | 0.473      | 0.792       | 0.866       | 0.890        |
| <b><i>F</i></b>  | 0.337     | -0.113     | -0.107     | 0.254      | -0.151     | 0.094      | 0.381      | -0.269     | -0.187      | 0.021       | 0.734        |
