# Supplementary material for: Serendipitous In Situ Conservation of Faba Bean Landraces in Tunisia: A Case Study
Source: MDPI journal article supplement (doi:10.3390/genes11020236), 2020-02-24
Supplement: s1 [file s1]

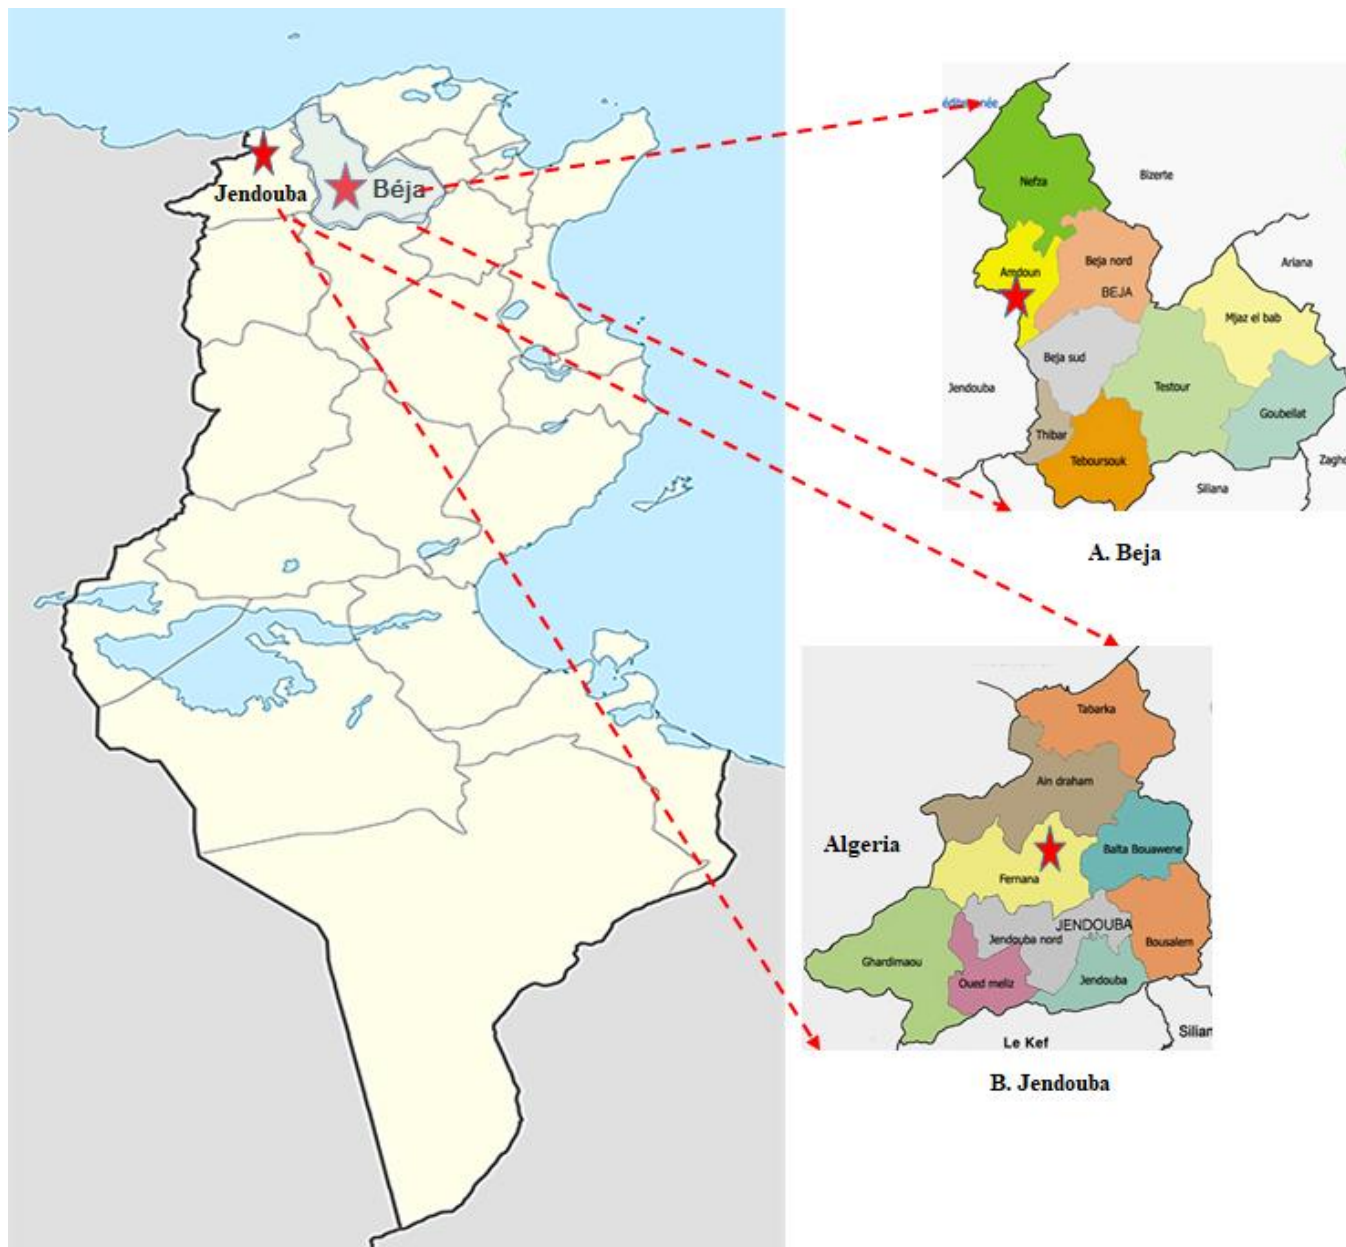

**Figure S1.** NGBT sampling. A.) Governorate of Beja (sampling Location: El Hamra in Amdoun province); B.) Governorate of Jendouba (sampling location Fouazia and Oued Ghrib in Fermana province).
