# Supplementary material for: Serendipitous In Situ Conservation of Faba Bean Landraces in Tunisia: A Case Study
Source: MDPI journal article supplement (doi:10.3390/genes11020236), 2020-02-24
Supplement: s1 [file s1]

**Table S1.** List of SSR markers used for genetic analysis of faba bean collection.

| SSR Locus | Sequence (5'-3')                                        | Ta (°C) | Repeat motif           | References |
|-----------|---------------------------------------------------------|---------|------------------------|------------|
| M9        | F: AATCACAAGCGACGACGAC<br>R: GCGGAATATGCAGACCAAAT       | 58      | (GA)8                  | [30]       |
| M22       | F: TCGCAATAGCACAGAACCTG<br>R: GATCAAACCTCCCAACCTCA      | 58      | (CCACCG)3              | "          |
| M25       | F: CGTCGTGAAAATCATGGAGA<br>R: CATTATTATTACCCCGCCTCA     | 57      | (ATC)6                 | "          |
| M27       | F: TCCGATCAATTCCTGAGAC<br>R: CGGTATCTTGCTTTCCTTCG       | 57      | (CGAAAA)3              | "          |
| M36       | F: GCGGGTTTATTCCATC<br>R: TCCGTTTGCGTAGC                | 47      | (CCA)8                 | "          |
| M41       | F: CAACGCGGCAGTTAAAGAAT<br>R: CAGGTATGGCTGACACCTCA      | 57      | (GGAACC)3              | "          |
| M43       | F: TTCTGATGAGAAGCCAACCA<br>R: GGGGGAGGAACCAGATTATT      | 57      | (AAT)5                 | "          |
| M46       | F: GGATGGATTGATTCTCCAACA<br>R: GCATAACTAACACATTATGCAGGA | 57      | (ATAA)4                | "          |
| SSR1      | F: ACCAGGCAGAGTTAGATAAGCA<br>R: GTCACCTCGGATGTCCAGGTAT  | 56      | (GGAACC)3              | [31]       |
| VFG1      | F: TTTCAGCAAACCTAGAACCAATC<br>R: GGCATTCAAGTTTTACCTTGTA | 53      | (AG)15                 | [32]       |
| VFG41     | F: AGCCCATGGTTCAAATGCAA<br>R: GCAGTCATGCCACTGCTTA       | 53      | (AG) <sub>7</sub> + 10 | "          |
